# Supplementary material for: Short-Term Magnesium Deficiency Triggers Nutrient Retranslocation in Arabidopsis thaliana
Source: Front Plant Sci. 2020 Jun 4;11:563. doi: 10.3389/fpls.2020.00563 (PMC7287120; doi:10.3389/fpls.2020.00563)
Supplement: Supplementary file 3 [file Data_Sheet_3.xlsx]

## Sheet: Supplementary Table S1
Supplementary Table S1 | List of genes with specific descriptions differentially expressed during magnesium deficiency in expanding leaves of Arabidopsis thaliana.
List of genes involved in photosynthesis and genes encoding sucrose/proton symporters among differentially expressed genes in expanding leaves.
The log2(Count-Mg/CountCtrl) values are presented only when there is a significant differences in expression between control and Mg-deficient plants (the Exact Test, p < 0.01).
Locus ID	Gene symbol	Description	log2(Count-Mg/CountCtrl)
			Day 3	Day 5	Day 8
Light harvesting
AT1G29930	CAB1	Chlorophyll a/b-binding protein gene 1			-2.04378
AT1G29920	CAB2	Chlorophyll a/b-binding protein gene 2	-1.0945	4.66016
AT1G29910	CAB3	Chlorophyll a/b-binding protein gene 3		1.14719	-0.842342
AT3G54890	LHCA1	Photosystem I light-harvesting complex gene 1			-2.02381
AT3G61470	LHCA2	Photosystem I light-harvesting complex gene 2			-2.50016
AT1G61520	LHCA3	Photosystem I light-harvesting complex gene 3			-1.79309
AT3G47470	LHCA4	Photosystem I light-harvesting complex gene 4	-0.492325	0.945415	-2.20248
AT1G45474	LHCA5	Photosystem I light-harvesting complex gene 5		-1.4604	-2.84446
AT1G19150	LHCA6	Photosystem I light-harvesting complex gene 6		-1.59115	-5.24514
AT1G08380	PSAO	Photosystem I subunit O		-1.04001	-1.98752
AT2G05100	LHCB2.1	Photosystem II light-harvesting complex gene 2.1	-0.588194	0.998386
AT5G54270	LHCB3	Photosystem II light-harvesting complex gene 3		0.757763	-1.61123
AT5G01530	LHCB4.1	Photosystem II light-harvesting complex gene 4.1		-1.5005	-1.55614
AT3G08940	LHCB4.2	Photosystem II light-harvesting complex gene 4.2		-1.36972	-1.35249
AT2G40100	LHCB4.3	Photosystem II light-harvesting complex gene 4.3			-3.33288
AT4G10340	LHCB5	Photosystem II light-harvesting complex gene 5			-2.50654
AT1G15820	LHCB6	Photosystem II light-harvesting complex gene 6	-0.574382	-1.23538	-2.4716
AT2G34430	LHB1B1	Photosystem II light-harvesting complex gene B1B1			-1.70673
AT2G34420	LHB1B2	Photosystem II light-harvesting complex gene B1B2			-1.64598
Magnesium chelatase
AT4G18480	CHLI1	Magnesium-chelatase I1		-1.38417
AT5G45930	CHLI2	Magnesium-chelatase I2		-2.9036	-2.03034
Chlorophyll degradation
AT4G22920	NYE1	Non-yellowing 1		2.24939	2.59565
Chlorophyll catabolite
AT3G13080	MRP3	Multidrug resistance-associated protein 3		5.97615	6.12644
Chlorophyll synthase
AT3G51820	CHLG	Pigment defenctive 325 (PDE325)		-1.44722	-2.53444
Ribulose bisphosphate carboxylase
AT1G67090	RBCS1A	Rubisco small subunit 1A			-1.73265
AT5G38430	RBCS1B	Rubisco small subunit 1B		-1.33176	-3.35401
AT5G38420	RBCS2B	Rubisco small subunit 2B		-1.71473	-4.00341
AT5G38410	RBCS3B	Rubisco small subunit 3B			-3.15502
Phosphoenolpyruvate carboxylase
AT2G42600	PPC2	Phosphoenolpyruvate carboxylase 2		-1.12488
Sucrose/proton symporter
AT1G71880	SUC1	Sucrose-proton symporter 1	0.794281	2.21184	1.3236
AT1G22710	SUC2	Sucrose-proton symporter 2	-0.63057		-1.50626
AT2G02860	SUC3	Sucrose-proton symporter 3			1.644
AT1G66570	SUC7	Sucrose-proton symporter 7			5.52076

## Sheet: Supplementary Table S2
Supplementary Table S2 | List of genes with specific descriptions differentially expressed within five days of magnesium deficiency treatment in expanding leaves of Arabidopsis thaliana.
List of genes encoding glutaredoxin, glutathione S-transferase tau and ferritin, and genes involved in systemic acquired resistance among up-regulated genes in expanding leaves wiithin five days of Mg deficiency treatment.
The log2(Count-Mg/CountCtrl) values are presented only when there is a significant differences in expression between control and Mg-deficient plants (the Exact Test, p < 0.01).
		Genes described by Song et al. (2004)
		Genes described by Breitenbach et al. (2014)
Locus ID	Gene symbol	Description	log2(Count-Mg/CountCtrl)
			Day 3	Day 5	Day 8
Glutaredoxin
AT1G03850	GRXS13	Glutaredoxin 13		3.16344
AT1G28480	GRX480	Glutaredoxin 480		7.88864	5.54523
Glutathione S-transferase tau
AT2G29490	GSTU1	Glutathione S-transferase tau 1		4.5437	5.48918
AT2G29460	GSTU4	Glutathione S-transferase tau 4	2.96402	8.00271	11.9088
AT3G09270	GSTU8	Glutathione S-transferase tau 8		7.56232	4.76602
AT5G62480	GSTU9	Glutathione S-transferase tau 9		11.6441	13.3276
AT1G74590	GSTU10	Glutathione S-transferase tau 10		7.89268	9.51047
AT1G78380	GSTU19	Glutathione S-transferase tau 19		1.93645	2.49667
AT1G78340	GSTU22	Glutathione S-transferase tau 22		6.34178	9.05039
AT1G17170	GSTU24	Glutathione S-transferase tau 24		7.6069	10.8366
AT1G17180	GSTU25	Glutathione S-transferase tau 25		8.0001	13.4192
Ferritin
AT5G01600	FER1	Ferritin 1		2.432	2.31901
AT2G40300	FER4	Ferritin 4		0.950256
Systemic acquired resistance
AT1G74710	EDS16	Encodes a protein with isochorismate synthase activity. Mutants fail to accumulate salicylic acid. Its function may be redundant with that of ICS2 (AT1G18870).		5.63912	6.69408
AT2G46370	JAR1	Encodes a jasmonate-amido synthetase that is a member of the GH3 family of proteins. JAR1 catalyzes the formation of a biologically active jasmonyl-isoleucine (JA-Ile) conjugate. JA-Ile promotes the interaction between JAZ1 and COI1 in the jasmonate signaling pathway. JAR1 localizes to the cytoplasm and is also a phytochrome A signaling component. JAR1 is an auxin-induced gene. Loss of function m…		1.21327
AT5G65600	LECRK-IX.2	Concanavalin A-like lectin protein kinase family protein;(source:Araport11)		4.48442	6.80823
AT1G22070	TGA3	Encodes a transcription factor. Like other TGAla-related factors, TGA3 has a highly conserved bZIP region and exhibits similar DNA-binding properties.		1.14586	1.38203
AT5G45110	NPR3	Encodes NPR3, a paralog of NPR1. Involved in negative regulation of defense responses against bacterial and oomycete pathogens. npr3 mutants has elevated level of PR1 expression. Interacts with TGA2, TGA3, TGA5 and TGA6 in yeast two hybrid assays. NPR3 and NPR4 are receptors for the immune signal salicylic acid. The mRNA is cell-to-cell mobile.		1.67625	3.0379
AT3G52430	PAD4	Encodes a lipase-like gene that is important for salicylic acid signaling and function in resistance (R) gene-mediated and basal plant disease resistance. PAD4 can interact directly with EDS1, another disease resistance signaling protein. Expressed at elevated level in response to green peach aphid (GPA) feeding, and modulates the GPA feeding-induced leaf senescence through a mechanism that doesn…		3.93027	4.79253
AT1G19250	FMO1	FMO1 is required for full expression of TIR-NB-LRR-conditioned resistance to avirulent pathogens and for basal resistance to invasive virulent pathogens. Functions in an EDS1-regulated but SA-independent mechanism that promotes resistance and cell death at pathogen infection sites.		9.31863	6.5106
AT5G52810	SARD4	NAD(P)-binding Rossmann-fold superfamily protein;(source:Araport11)	1.22173		4.01603
AT3G56400	WRKY70	member of WRKY Transcription Factor; Group III. Function as activator of SA-dependent defense genes and a repressor of JA-regulated genes. WRKY70-controlled suppression of JA-signaling is partly executed by NPR1.		1.85982	3.17001
AT4G12470	AZI1	Encodes AZI1 (AZELAIC ACID INDUCED 1). Involved in the priming of salicylic acid induction and systemic immunity triggered by pathogen or azelaic acid. Targeting if AZI1 to chloroplasts is increased during SAR induction and that localization requires the PRR domain.It is involved in the uptake and movement of the azelaic acid signal.		6.10465	5.01286
AT4G23170	EP1 (AED19)	Induced in response to Salicylic acid.Similar to receptor-like kinase 4 and 5. NPR1, a known positive regulator of the SA signaling pathway is responsible for the SA-dependent induction and constitutive repression of EP1 gene's basal expression. The mRNA is cell-to-cell mobile.		1.00439	1.66174
AT3G57260	BGL2 (PR2)	beta 1,3-glucanase	1.86068	3.48235	7.60392
AT5G10760	AED1	Eukaryotic aspartyl protease family protein;(source:Araport11)	1.56493	1.46858	2.68513
AT1G75040	PR5	Thaumatin-like protein involved in response to pathogens. mRNA level of the PR-5 gene (At1g75040)is significantly changed after cutting the inflorescence stem indicating the existence of a network of signal transducing pathways as other stress-regulated genes (At5g01410, At3g17800, At1g29930)do not response to the treatment. The mRNA is cell-to-cell mobile.	1.35901	3.29098	6.14866
AT5G03350	LLP1 (AED9)	Legume lectin family protein;(source:Araport11)		1.1729
AT2G38470	WRKY33	Member of the plant WRKY transcription factor family. Regulates the antagonistic relationship between defense pathways mediating responses to P. syringae and necrotrophic fungal pathogens. Located in nucleus. Involved in response to various abiotic stresses - especially salt stress.		4.92245	4.15029
AT5G40990	GLIP1	Component of plant resistance. Contains lipase signature motif and GDSL domain. Directly interferes with the fungal infection process by acting on fungal cell walls through its action as a antimicrobial compound. Critical component for both local and systemic resistance responses in the incompatible interaction with Alternaria brassicicola in the ethylene-dependent pathway.		5.72672	7.95907
AT4G37150	MES9	Encodes a protein shown to have carboxylesterase activity, methyl salicylate esterase activity, methyl jasmonate esterase activity, and methyl IAA esterase activity in vitro. MES9 appears to be involved in MeSA hydrolysis in planta. Expression of MES9 can restore systemic acquired resistance in SAR-deficient tobacco plants. This protein does not act on MeGA4, or MEGA9 in vitro.		3.57376	8.26638
AT3G04720	PR4	Encodes a protein similar to the antifungal chitin-binding protein hevein from rubber tree latex. mRNA levels increase in response to ethylene and turnip crinkle virus infection. The mRNA is cell-to-cell mobile.	1.59051
AT3G48090	EDS1	Component of R gene-mediated disease resistance in Arabidopsis thaliana with homology to eukaryotic lipases.		2.38208	2.42249
AT1G59870	PEN3	ATP binding cassette transporter. Localized to the plasma membrane in uninfected cells. In infected leaves, the protein concentrated at infection sites. Contributes to nonhost resistance to inappropriate pathogens that enter by direct penetration in a salicylic acid?dependent manner. Required for mlo resistance. Has Cd transporter activity (Cd2+ extrusion pump) and contributes to heavy metal resi…		1.76959	1.26361
AT2G13810	ALD1	AGD2-like defense response protein 1;(source:Araport11)	4.68833	11.0626	11.24
AT2G18660	PNP-A (AED14)	Encodes PNP-A (Plant Natriuretic Peptide A). PNPs are a class of systemically mobile molecules distantly related to expansins; their biological role has remained elusive. PNP-A contains a signal peptide domain and is secreted into the extracellular space. Co-expression analyses using microarray data suggest that PNP-A may function as a component of plant defence response and SAR in particular, an…	1.69264	6.49123	7.55715
AT2G43570	CHI (AED15)	chitinase;(source:Araport11)		5.41787	4.90668
AT4G01370	MPK4	Encodes a nuclear and cytoplasmically localized MAP kinase involved in mediating responses to pathogens. Its substrates include MKS1 and probably MAP65-1.The MAP65-1 interaction is involved in mediating cortical microtuble organization. Required for male-specific meiotic cytokinesis. The mRNA is cell-to-cell mobile.		1.57907	0.763337
AT5G64930	CPR5	Regulator of expression of pathogenesis-related (PR) genes. Participates in signal transduction pathways involved in plant defense (systemic acquired resistance -SAR).		1.19356	2.15765
AT5G55460	ATLTP4.5	Bifunctional inhibitor/lipid-transfer protein/seed storage 2S albumin superfamily protein;(source:Araport11)		2.47474	2.93763
AT2G14610	PR1	PR1 gene expression is induced in response to a variety of pathogens. It is a useful molecular marker for the SAR response. Though the Genbank record for the cDNA associated to this gene is called 'PR-1-like', the sequence actually corresponds to PR1. Expression of this gene is salicylic-acid responsive.		3.87184	5.22696
AT5G55450	ATLTP4.4	Bifunctional inhibitor/lipid-transfer protein/seed storage 2S albumin superfamily protein;(source:Araport11)	0.964783	2.47415	3.96418

## Sheet: Supplementary Table S3
Supplementary Table S3 | Transcriptional levels of genes encoding known and putative magnesium transporters in roots of Arabidopsis thaliana.
Means (n = 3 – 6) of normalised transcript counts of genes encoding known and putative Mg2+ transporters in roots of control and Mg-deficient plants on day 3 of Mg deficiency treatment (N.D., not determined).
No significant difference was found in expression between control and Mg-deficient plants (the Exact Test, p > 0.01).
Locus ID	Gene symbol	Description	CountCtrl	Count-Mg	log2(Count-Mg/CountCtrl)
AT1G16010	MRS2-1	Magnesium transporter 2 (MGT2)	60.5255	41.3155	-0.550859
AT5G64560	MRS2-2	Magnesium transporter 9 (MGT9)	52.7211	54.6022	0.0505781
AT3G19640	MRS2-3	Magnesium transporter 4 (MGT4)	60.808	81.0731	0.414962
AT3G58970	MRS2-4	Magnesium transporter 6 (MGT6)	21.6839	21.6334	-0.00336306
AT2G03620	MRS2-5	Magnesium transporter 3 (MGT3)	18.6873	29.0302	0.635496
AT4G28580	MRS2-6	Magnesium transporter 5 (MGT5)	N.D.	N.D.	N.D.
AT5G09690	MRS2-7	Magnesium transporter 7 (MGT7)	102.641	116.828	0.18677
AT1G80900	MRS2-10	Magnesium transporter 1 (MGT1)	12.8163	12.9207	0.0117143
AT5G22830	MRS2-11	Magnesium transporter 10 (MGT10)	13.604	19.3583	0.508925
AT1G29830		Magnesium transporter CorA-like family protein	7.54685	6.01276	-0.327849
AT5G09720		Magnesium transporter CorA-like family protein	9.27973	9.68082	0.0610462
AT1G29820		Magnesium transporter CorA-like family protein	32.9087	35.9594	0.127898
AT2G42950		Magnesium transporter CorA-like family protein	7.71638	9.91894	0.362262
AT2G04305		Magnesium transporter CorA-like family protein	69.0558	68.3778	-0.0142344
AT2G47600	MHX1	Magnesium/proton exchanger 1	23.0528	18.2685	-0.335586
AT1G61790	OST3/6	Oligosaccharyltransferase subunit 3/6	356.003	278.47	-0.354368
AT4G29870		Oligosaccharyltransferase complex/magnesium transporter family protein	119.891	85.5981	-0.486079
AT1G11560		Oligosaccharyltransferase complex/magnesium transporter family protein	N.D.	N.D.	N.D.
AT2G19340		Oligosaccharyltransferase complex/magnesium transporter family protein	49.6299	53.8187	0.116899
AT3G23870		Magnesium transporter NIPA	9.39049	8.90234	-0.0770161
AT4G13800		Magnesium transporter NIPA	N.D.	N.D.	N.D.
AT5G11960		Magnesium transporter, putative	32.0172	28.6894	-0.158327
AT3G26670		Magnesium transporter, putative	41.4228	39.2616	-0.0773048
AT1G71900		Magnesium transporter, putative	11.2571	22.0659	0.970987
AT1G34470		Magnesium transporter, putative	12.8924	18.8505	0.54808
AT4G09640		Magnesium transporter, putative	8.38392	8.68613	0.0510889
AT2G21120		Magnesium transporter, putative	64.2553	58.3578	-0.138891
AT4G38730		Magnesium transporter, putative	12.662	14.3941	0.184972
AT5G03345	PRCE2	PSI-interacting root-cell enriched 2	200.818	209.639	0.0620202
